# Supplementary material for: From BiI3to CuBiI4: a striking improvement in the photoelectric performance of a novel photodetector candidate
Source: Royal Society of Chemistry journal article supplement (doi:10.1039/d0tc01188f), 2020-01-01
Supplement: d0tc01188f1.pdf [file d0tc01188f1.pdf]

## Supporting Information

# From BiI<sub>3</sub> to CuBiI<sub>4</sub>: a Striking Improvement in Photoelectric Performance as a Novel Photodetector Candidate

Nannan Qu,<sup>#, a, b</sup> Yan Lei,<sup>\*, #, a</sup> Xiaogang Yang,<sup>a</sup> Xiaojing Hu,<sup>a</sup> Wencai Zhao,<sup>a</sup>  
Chaoliang Zhao,<sup>a</sup> Zhi Zheng<sup>\*, a, c</sup>

<sup>a</sup> Key Laboratory for Micro-Nano Energy Storage and Conversion Materials of Henan Province, College of Advanced Materials and Energy, Institute of Surface Micro and Nano Materials, Xuchang University, Henan 461000, P. R. China.

<sup>b</sup> College of Chemistry, Zhengzhou University, Zhengzhou 450001, China.

<sup>c</sup> Henan Joint International Research Laboratory of Nanomaterials for Energy and Catalysis, Xuchang University, 461000, Henan, P. R. China.

<sup>#</sup> These authors contribute to this work equally.

\*Corresponding author: Yan Lei (Email: leiyan@xcu.edu.cn); Zhi Zheng (Email: zzheng@xcu.edu.cn)

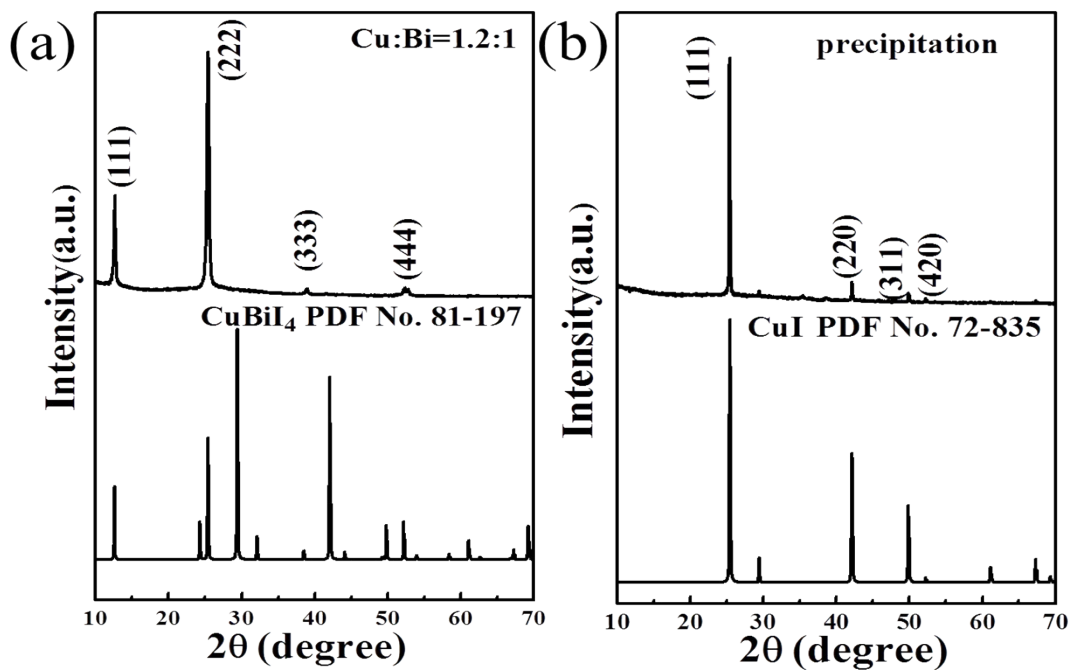

**Figure S1.** (a) XRD pattern of the thin films with 1.2 : 1 started Cu and Bi molar ratio; (b) XRD patterns of the precipitate that separated from the precursor solution with 1.2 : 1 started Cu and Bi molar ratio.

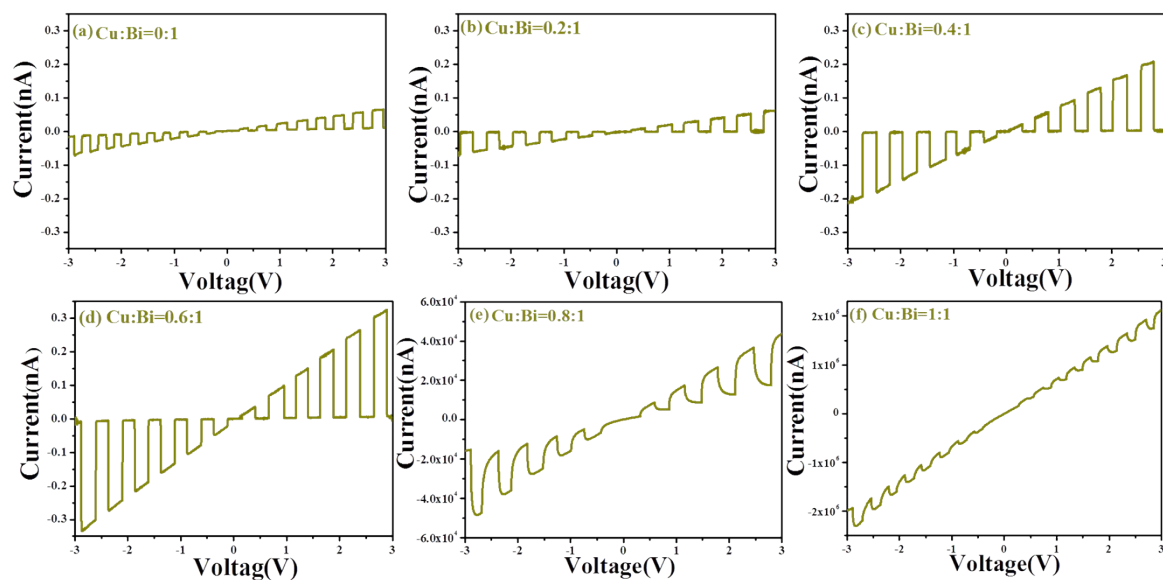

**Figure S2.** I-V curves of the photodetectors under on-off light illumination ( $100 \text{ mW/cm}^2$ ) with -3 V to 3 V bias voltage.

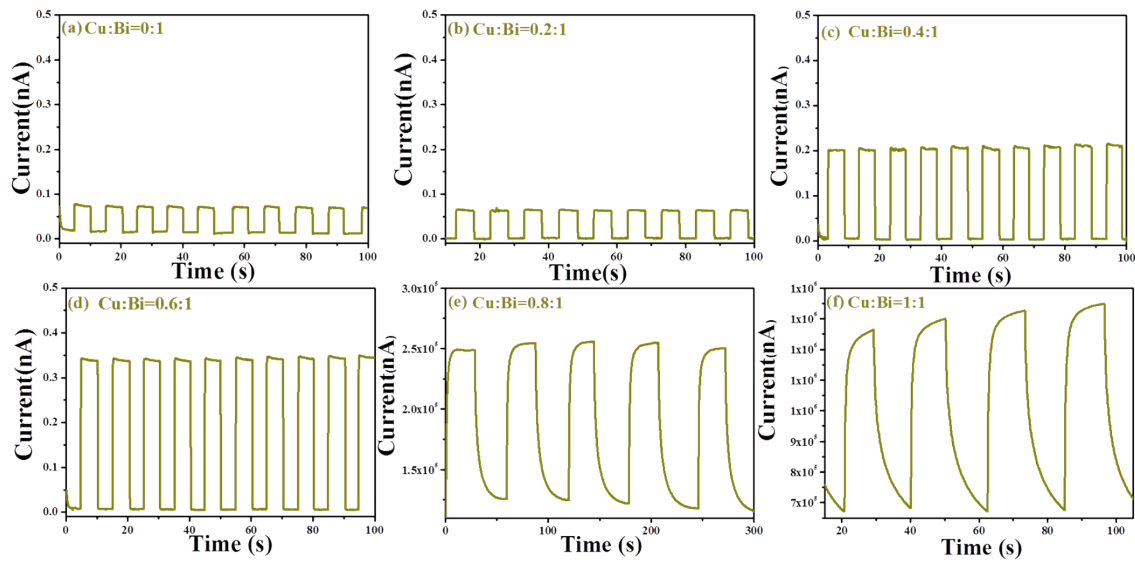

**Figure S3.** I-t curves of the photodetectors under on-off light illumination (100 mW/cm<sup>2</sup>) with 3 V bias voltage.
